# Supplementary material for: Stimulation-induced structural changes at the nucleus, endoplasmic reticulum and mitochondria of hippocampal neurons
Source: PubMed Central journal article supplement (PMC6062868; doi:10.1186/s13041-018-0387-2), 2018-07-27
Supplement: 13041_2018_387_MOESM2_ESM.pdf [file 13041_2018_387_MOESM2_ESM.pdf]

**Additional file 2. Chromatin clustered upon depolarization in neurons but not in astrocytes.**

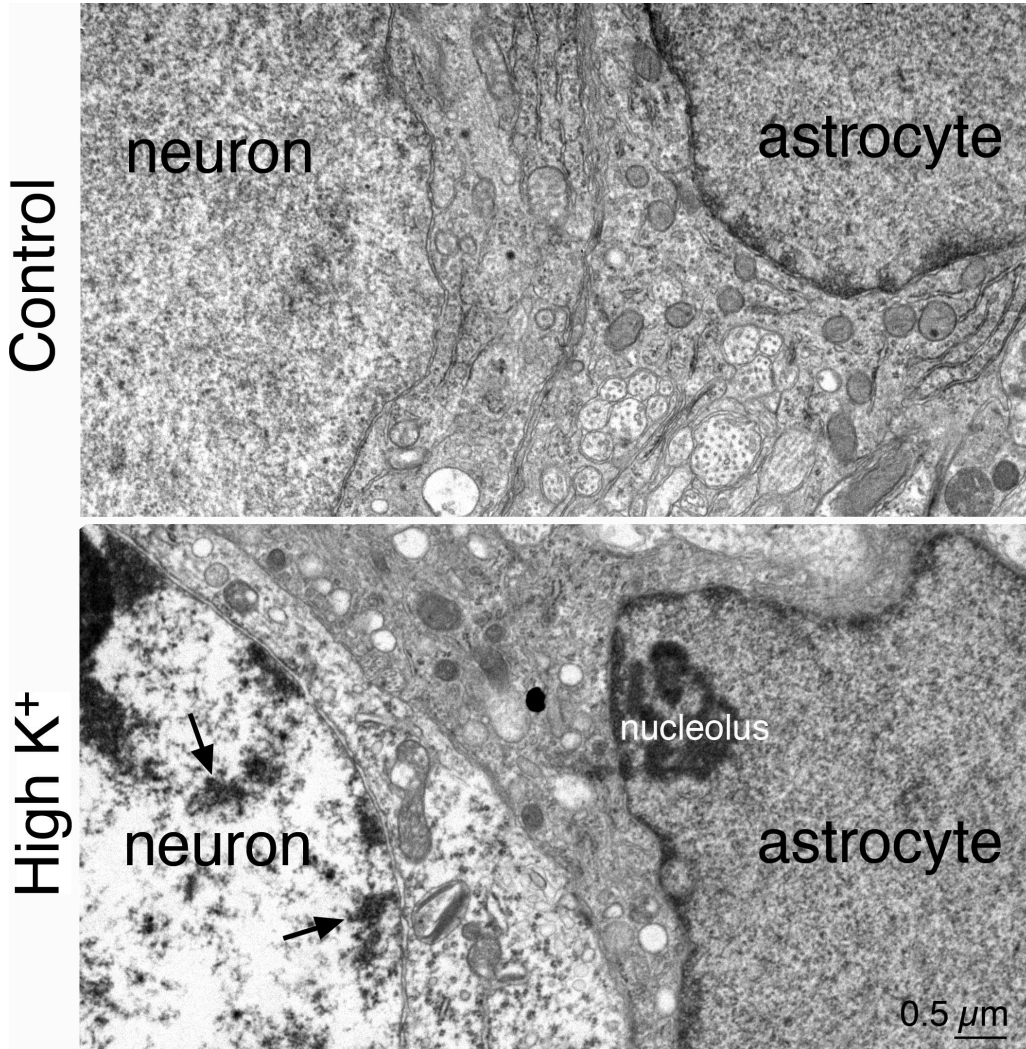

In hippocampal slice cultures under control conditions, neuronal chromatin appeared non-clustered while the chromatin in astrocytes showed a dark rim of irregular thickness. Upon treatment with high  $K^+$  (90 mM for 3 min), neuronal chromatin formed dark aggregates (arrows) while no structural changes were detected in the nucleus of astrocytes. Scale bar = 0.5  $\mu\text{m}$ .
